# Supplementary material
Source: PubMed Central journal article supplement (PMC5726309)
Supplement: jamapediatr-171-e172222-s001.pdf [file jamapediatr-171-e172222-s001.pdf]

## Supplementary Online Content

Zash R, Jacobson DL, Diseko M, et al. Comparative safety of antiretroviral treatment regimens in pregnancy. *JAMA Pediatr*. Published online August 7, 2017. doi:10.1001/jamapediatrics.2017.2222

### **eTable.** Additional Analyses

This supplementary material has been provided by the authors to give readers additional information about their work.

**eTable. Additional Analyses**

|                                                                   | <b>TDF/FTC/<br/>EFV<br/>aRR (95% CI)</b> | <b>TDF/FTC/<br/>NVP<br/>aRR (95% CI)</b> | <b>ZDV/3TC/<br/>NVP<br/>aRR (95% CI)</b> | <b>TDF/FTC/<br/>LPV-r<br/>aRR (95% CI)</b> | <b>ZDV/3TC/<br/>LPV-r<br/>aRR (95% CI)</b> |
|-------------------------------------------------------------------|------------------------------------------|------------------------------------------|------------------------------------------|--------------------------------------------|--------------------------------------------|
| <b>Restricted to CD4 &gt;350 in pregnancy</b>                     |                                          |                                          |                                          |                                            |                                            |
| <b>Any Adverse Outcome</b>                                        | 1 [Reference]                            | 1.0 (0.8-0.3)                            | 1.3 (1.1-1.6)                            | 1.2 (0.9-1.7)                              | 1.2 (0.8-1.8)                              |
| <b>Any Severe Adverse Outcome</b>                                 | 1 [Reference]                            | 1.3 (0.9-2.0)                            | 2.4 (1.0-2.0)                            | 1.6 (0.9-2.9)                              | 2.7 (1.5-4.8)                              |
| <b>Preterm (&lt;37wks)</b>                                        | 1 [Reference]                            | 0.5 (0.3-0.8)                            | 0.9 (0.7-1.2)                            | 1.4 (0.9-2.2)                              | 0.8 (0.4-1.6)                              |
| <b>Very Preterm (&lt;32wks)</b>                                   | 1 [Reference]                            | 0.9 (0.4-2.2)                            | 1.1 (0.6-2.2)                            | 1.8 (0.6-5.2)                              | 1.3 (0.3-5.6)                              |
| <b>Small for gestational age (SGA) (&lt;10<sup>th</sup>%tile)</b> | 1 [Reference]                            | 1.7 (1.2-2.3)                            | 1.8 (1.3-2.4)                            | 1.4 (0.8-2.3)                              | 1.8 (1.1-3.2)                              |
| <b>Very SGA (&lt;3<sup>rd</sup> %tile)</b>                        | 1 [Reference]                            | 1.6 (0.9-2.7)                            | 1.5 (0.9-2.4)                            | 2.0 (1.0-4.1)                              | 2.6 (1.2-5.8)                              |
| <b>Stillbirth</b>                                                 | *                                        |                                          |                                          |                                            |                                            |
| <b>Neonatal Death</b>                                             | *                                        |                                          |                                          |                                            |                                            |
| <b>Adjusted for CD4 count</b>                                     |                                          |                                          |                                          |                                            |                                            |
| <i>Any Adverse Outcome</i>                                        |                                          |                                          |                                          |                                            |                                            |
| <b>Model excluding unknown CD4</b>                                | 1 [Reference]                            | 1.1 (0.9-1.3)                            | 1.3 (1.1-1.5)                            | 1.2 (0.9-1.6)                              | 1.1 (0.8-1.7)                              |
| <b>Additionally adjusting for CD4 (continuous)</b>                | 1 [Reference]                            | 1.1 (0.9-1.3)                            | 1.3 (1.1-1.5)                            | 1.3 (1.0-1.7)                              | 1.2 (0.8-1.7)                              |
| <b>Additionally adjusting for CD4 (categorical)</b>               | 1 [Reference]                            | 1.1 (0.9-1.3)                            | 1.3 (1.1-1.5)                            | 1.2 (0.9-1.7)                              | 1.2 (0.8-1.7)                              |
| <i>Any Severe Adverse Outcome</i>                                 |                                          |                                          |                                          |                                            |                                            |
| <b>Model excluding unknown CD4</b>                                | 1 [Reference]                            | 1.4 (0.9-2.0)                            | 1.4 (1.0-2.0)                            | 1.6 (0.9-2.8)                              | 2.4 (1.4-4.2)                              |

|                                                                                               | TDF/FTC/<br>EFV<br>aRR (95% CI) | TDF/FTC/<br>NVP<br>aRR (95% CI) | ZDV/3TC/<br>NVP<br>aRR (95% CI) | TDF/FTC/<br>LPV-r<br>aRR (95% CI) | ZDV/3TC/<br>LPV-r<br>aRR (95% CI) |
|-----------------------------------------------------------------------------------------------|---------------------------------|---------------------------------|---------------------------------|-----------------------------------|-----------------------------------|
| <b>Any Severe Adverse Outcome (cont.)</b>                                                     |                                 |                                 |                                 |                                   |                                   |
| <b>Additionally adjusting for CD4 (continuous)</b>                                            | 1 [Reference]                   | 1.4 (1.0-2.1)                   | 1.5 (1.0-2.0)                   | 1.8 (1.0-3.1)                     | 2.6 (1.5-4.5)                     |
| <b>Additionally adjusting for CD4 (categorical)</b>                                           | 1 [Reference]                   | 1.4 (1.0-2.1)                   | 1.5 (1.1-2.0)                   | 1.7 (1.0-2.9)                     | 2.4 (1.4-4.2)                     |
| <b>Adjusted for time on ART prior to conception (days)</b>                                    |                                 |                                 |                                 |                                   |                                   |
| <b>Any Adverse Outcome</b>                                                                    | 1 [Reference]                   | 1.1 (1.0-1.3)                   | 1.3 (1.2-1.5)                   | 1.3 (1.1-1.5)                     | 1.2 (1.0-1.5)                     |
| <b>Any Severe Adverse Outcome</b>                                                             | 1 [Reference]                   | 1.4 (1.2-1.8)                   | 1.7 (1.4-2.0)                   | 1.5 (1.1-2.1)                     | 1.9 (1.4-2.6)                     |
| <b>Adjusted for time on ART prior to conception (categorical: &lt;2yrs- 2-5yrs- &gt;5yrs)</b> |                                 |                                 |                                 |                                   |                                   |
| <b>Any Adverse Outcome</b>                                                                    | 1 [Reference]                   | 1.1 (1.0-1.3)                   | 1.3 (1.2-1.4)                   | 1.3 (1.1-1.5)                     | 1.2 (1.0-1.5)                     |
| <b>Any Severe Adverse Outcome</b>                                                             | 1 [Reference]                   | 1.4 (1.1-1.7)                   | 1.6 (1.3-2.0)                   | 1.4 (1.0-2.0)                     | 1.8 (1.3-2.5)                     |
| <b>Adjusted for calendar year of delivery</b>                                                 |                                 |                                 |                                 |                                   |                                   |
| <b>Any Adverse Outcome</b>                                                                    | 1 [Reference]                   | 1.1 (1.0-1.3)                   | 1.3 (1.2-1.4)                   | 1.3 (1.1-1.5)                     | 1.2 (1.0-1.5)                     |
| <b>Any Severe Adverse Outcome</b>                                                             | 1 [Reference]                   | 1.4 (1.2-1.8)                   | 1.7 (1.5-2.0)                   | 1.6 (1.2-2.1)                     | 1.9 (1.4-2.6)                     |
| <b>Re-categorized all unspecified ART started after Jan 1, 2012 as TDF/FTC/EFV</b>            |                                 |                                 |                                 |                                   |                                   |
| <b>Any Adverse Outcome</b>                                                                    | 1 [Reference]                   | 1.1 (1.0-1.2)                   | 1.3 (1.2-1.4)                   | 1.3 (1.1-1.5)                     | 1.2 (1.0-1.4)                     |
| <b>Any Severe Adverse Outcome</b>                                                             | 1 [Reference]                   | 1.3 (1.1-1.6)                   | 1.5 (1.3-1.8)                   | 1.4 (1.1-1.9)                     | 1.8 (1.3-2.4)                     |

|                                                                                                                            | TDF/FTC/<br>EFV<br>aRR (95% CI)        | TDF/FTC/<br>NVP<br>aRR (95% CI)       | ZDV/3TC/<br>NVP<br>aRR (95% CI)        | TDF/FTC/<br>LPV-r<br>aRR (95% CI)        | ZDV/3TC/<br>LPV-r<br>aRR (95% CI) |
|----------------------------------------------------------------------------------------------------------------------------|----------------------------------------|---------------------------------------|----------------------------------------|------------------------------------------|-----------------------------------|
| <b>Included all births to women who were on ART at conception but changed or terminated ART (using conception regimen)</b> |                                        |                                       |                                        |                                          |                                   |
| Any Adverse Outcome                                                                                                        | 1 [Reference]                          | 1.1 (1.0-1.3)                         | 1.3 (1.2-1.4)                          | 1.3 (1.1-1.5)                            | 1.2 (1.0-1.5)                     |
| Any Severe Adverse Outcome                                                                                                 | 1 [Reference]                          | 1.4 (1.2-1.7)                         | 1.7 (1.4-2.0)                          | 1.6 (1.2-2.1)                            | 1.9 (1.4-2.6)                     |
| <b>Adjusted models including the robust variance estimator for clustering by maternity site</b>                            |                                        |                                       |                                        |                                          |                                   |
| Any Adverse Outcome                                                                                                        | 1 [Reference]                          | 1.1 (1.0-1.3)                         | 1.3 (1.2-1.4)                          | 1.3 (1.2-1.4)                            | 1.2 (1.0-1.5)                     |
| Any Severe Adverse Outcome                                                                                                 | 1 [Reference]                          | 1.4 (1.2-1.6)                         | 1.7 (1.5-1.9)                          | 1.6 (1.4-1.8)                            | 1.9 (1.7-2.2)                     |
| <b>Excluded Neonatal Death from the primary composite outcomes</b>                                                         |                                        |                                       |                                        |                                          |                                   |
| Any Adverse Outcome                                                                                                        | 1 [Reference]                          | 1.1 (1.0-1.3)                         | 1.3 (1.2-1.4)                          | 1.3 (1.1-1.5)                            | 1.2 (1.0-1.4)                     |
| Any Severe Adverse Outcome                                                                                                 | 1 [Reference]                          | 1.4 (1.2-1.7)                         | 1.7 (1.4-2.0)                          | 1.6 (1.2-2.2)                            | 1.8 (1.3-2.5)                     |
| <b>Excluded SGA if gestational age &gt;39wks</b>                                                                           |                                        |                                       |                                        |                                          |                                   |
| SGA (<10 <sup>th</sup> %tile)                                                                                              | 1 [Reference]                          | 1.7 (1.4-2.1)                         | 2.0 (1.7-2.4)                          | 1.7 (1.2-2.3)                            | 1.2 (0.8-1.9)                     |
| <b>Low Birthweight (LBW)</b>                                                                                               |                                        |                                       |                                        |                                          |                                   |
| LBW <2500g                                                                                                                 | 1 [Reference]                          | 1.3 (1.1-1.5)                         | 1.6 (1.5-1.9)                          | 1.4 (1.1-1.8)                            | 1.6 (1.2-2.1)                     |
| Very LBW <1500g                                                                                                            | 1 [Reference]                          | 1.6 (1.1-2.5)                         | 2.2 (1.6-3.0)                          | 1.6 (0.8-3.1)                            | 2.2 (1.2-4.3)                     |
| <b>Time on ART prior to conception as the exposure (adjusting for ART regimen)</b>                                         | <b>&lt;2years<br/>aRR<br/>(95% CI)</b> | <b>2-4 years<br/>aRR<br/>(95% CI)</b> | <b>5-10 years<br/>aRR<br/>(95% CI)</b> | <b>&gt;10 years<br/>aRR<br/>(95% CI)</b> |                                   |
| Any Adverse Outcome                                                                                                        | 1 [Reference]                          | 0.9 (0.8-1.1)                         | 1.0 (0.8-1.1)                          | 0.9 (0.7-1.0)                            |                                   |
| Any Severe Adverse Outcome                                                                                                 | 1 [Reference]                          | 0.9 (0.7-1.2)                         | 0.9 (0.7-1.2)                          | 0.8 (0.6-1.1)                            |                                   |

\* Due to low number of outcomes, models do not converge.
